# Supplementary material
Source: Springer Nature journal article supplement (https://www.springermedizin.de/resource/supplementary/13058_2006_1574_MOESM1_ESM.pdf/9699428)
Supplement: MOESM1 [file 9699428]

| Variable          | Adjacent +<br>Reduction<br>Epithelium<br>(Fig 5, panel A) | Adjacent<br>Epithelium<br>(Fig 5, panel B) | Adjacent +<br>Reduction Stroma<br>(Fig 5, panel C) | Adjacent Stroma<br>(Fig 5, panel D) |
|-------------------|-----------------------------------------------------------|--------------------------------------------|----------------------------------------------------|-------------------------------------|
| Lymph Node Status | 0.656                                                     | 1.00                                       | 0.692                                              | 1.00                                |
| ER                | 0.393                                                     | 0.673                                      | 1.00                                               | 1.00                                |
| Grade             | 1.00                                                      | 0.671                                      | 0.689                                              | 0.226                               |
| HER2              | 1.00                                                      | 0.613                                      | 0.643                                              | 1.00                                |
| PR                | 0.669                                                     | 1.00                                       | 0.689                                              | 0.688                               |
| Age of Operation  | 0.704                                                     | 0.297                                      | 0.356                                              | 0.479                               |
| Tumor Size        | 0.253                                                     | 0.113                                      | 0.240                                              | 0.513                               |
| Menopausal Status | 0.266                                                     | 0.589                                      | 0.494                                              | 0.288                               |
| Recurrence        | 0.0526                                                    | 0.116                                      | 1.00                                               | 0.645                               |
| Cellularity       | NA                                                        | NA                                         | 0.0051                                             | 0.000209                            |

Supplementary Table S1
